## Original Article

# Epidemiological aspects of travel-related systemic endemic mycoses: a GeoSentinel analysis, 1997–2017

Helmut J. F. Salzer<sup>1</sup>, Rhett J. Stoney<sup>2</sup>, Kristina M. Angelo<sup>2</sup>, Thierry Rolling<sup>3,4</sup>, Martin P. Grobusch<sup>5</sup>, Michael Libman<sup>6</sup>, Rogelio López-Vélez<sup>7</sup>, Alexandre Duvignaud<sup>8</sup>, Hilmir Ásgeirsson<sup>9,10</sup>, Clara Crespillo-Andújar<sup>11</sup>, Eli Schwartz<sup>12</sup>, Philippe Gautret<sup>13</sup>, Emmanuel Bottieau<sup>14</sup>, Sabine Jordan<sup>3</sup>, Christoph Lange<sup>1,15,16</sup>, and Davidson H. Hamer<sup>17,18\*</sup>, for the GeoSentinel Surveillance Network

<sup>1</sup>Division of Clinical Infectious Diseases and German Center for Infection Research Tuberculosis Unit, Research Center Borstel, Leibniz Lung Center, Borstel, Germany, <sup>2</sup>Travelers' Health Branch, Division of Global Migration and Quarantine, Centers for Disease Control and Prevention (CDC), Atlanta, GA, USA, <sup>3</sup>Section of Infectious Diseases and Tropical Medicine, 1st Department of Internal Medicine, University Medical Centre Hamburg-Eppendorf, Hamburg, Germany, <sup>4</sup>Department of Clinical Research, Bernhard Nocht Institute for Tropical Medicine, Hamburg, Germany, <sup>5</sup>Center of Tropical Medicine and Travel Medicine, Department of Infectious Diseases, Division of Internal Medicine, Academic Medical Center, University of Amsterdam, The Netherlands, <sup>6</sup>J. D. MacLean Centre for Tropical Diseases, McGill University, Montreal, Canada, <sup>7</sup>National Referral Unit for Tropical Diseases, Infectious Diseases Department, Ramon y Cajal University Hospital, Madrid, Spain, <sup>8</sup>Tropical Medicine Department, University Hospital Center, Bordeaux, France, <sup>9</sup>Department of Infectious Diseases, Karolinska University Hospital, Stockholm, Sweden, <sup>10</sup>Division of Infectious Diseases, Department of Medicine Huddinge, Karolinska Institutet, Stockholm, Sweden, <sup>11</sup>National Referral Unit for Tropical and Travel Medicine, Department of Internal Medicine, Hospital Universitario La Paz-Carlos III, Madrid, Spain, <sup>12</sup>The Center for Geographic Medicine and Internal Medicine 'C' Chaim Sheba Medical Center, Tel HaShomer, and Sackler Faculty of Medicine, Tel Aviv University, Tel Aviv, Israel, <sup>13</sup>Méditerranée Infection, Faculté de Médecine et de Pharmacie, Aix-Marseille-Université, Marseille, France, <sup>14</sup>Department of Clinical Sciences, Institute of Tropical Medicine, Antwerp, Belgium, <sup>15</sup>International Health/Infectious Diseases, University of Lübeck, Lübeck, Germany, <sup>16</sup>Department of Medicine, Karolinska Institute, Stockholm, Sweden, <sup>17</sup>Department of Global Health, Boston University School of Public Health, Boston, MA, USA and <sup>18</sup>Section of Infectious Diseases, Department of Medicine, Boston Medical Center, Boston, MA, USA

\*To whom correspondence should be addressed. Email: dhamer@bu.edu

Submitted 23 May 2018; Revised 3 July 2018; Editorial decision 9 July 2018; Accepted 15 July 2018

## Abstract

**Background:** International travel has increased in the past few decades, placing more travellers at risk of acquiring systemic endemic mycoses. There are limited published data on systemic endemic mycoses among international travellers. We report epidemiological characteristics of non-migrant, international travellers who acquired systemic endemic mycoses during travel.

**Methods:** We analysed records of non-migrant international travellers with a confirmed diagnosis of histoplasmosis, coccidioidomycosis, paracoccidioidomycosis, blastomycosis or talaromycosis reported from 1997 through 2017 to GeoSentinel, a global surveillance network now consisting of 70 travel or tropical medicine centres in 31 countries.

**Results:** Sixty-nine records met the inclusion criteria. Histoplasmosis was most frequently reported; the 51 travellers with histoplasmosis had the lowest median age (30 years; range: 8–85) and shortest median duration of travel

(12 days; range: 5–154). Coccidioidomycosis was reported in 14 travellers; travellers with coccidioidomycosis were older (median 62 years; range: 22–78) and had the longest median number of days between return from travel and presentation to a GeoSentinel site (55 days; range: 17–273). Almost all travellers with coccidioidomycosis were exposed in the USA. Other systemic endemic mycoses were less frequently reported, including blastomycosis (three travellers) and talaromycosis (one traveller).

**Conclusions:** Although relatively rare, systemic endemic mycoses should be considered as potential travel-related infections in non-migrant international travellers. Epidemiological exposures should be used to guide diagnostic evaluations and treatment.

**Key words:** Systemic endemic mycoses, GeoSentinel, traveller

## Introduction

Systemic endemic mycoses are a group of fungal infections, including histoplasmosis, coccidioidomycosis, paracoccidioidomycosis, blastomycosis and talaromycosis, that share several characteristics. These fungi are dimorphic, have the potential to cause systemic infection, are found in the environment (particularly in soil) and are transmitted by inhalation of fungal spores or through the skin.<sup>1</sup> Some of these diseases may occur worldwide, while others occur in distinct geographical regions.

Histoplasmosis is the most common systemic endemic mycosis and has the largest geographic distribution, including North America, Central America, South America, Africa, Asia and Oceania. Some autochthonous cases have been described in Europe.<sup>2</sup> The prevalence may vary considerably within a country; for example, in the USA, most patients are exposed in the South and Midwest, particularly in the Ohio and Mississippi River valleys.<sup>3</sup> Paracoccidioidomycosis is primarily found in tropical and subtropical regions of Central and South America, particularly in Brazil, where it is considered a major public health issue in some regions.<sup>4</sup> Talaromycosis, caused by the fungus *Talaromyces marneffei* (formerly *Penicillium marneffei*), is endemic in Southeast Asia (particularly Thailand, Vietnam, Laos and southern China). Patients with human immunodeficiency virus (HIV) infection are at highest risk; it has a high case fatality rate of 11–21% depending on immune status and treatment.<sup>5</sup>

Coccidioidomycosis is found in warm and dry climates, including some states in the southwest USA.<sup>6</sup> The incidence in the USA increased in recent years with an estimated 150 000 new infections.<sup>7,8</sup> In some endemic regions of Central and South America, coccidioidomycosis leads to a large number of hospital admissions (e.g. Brazil's hospital admissions reached 7.1 per 100 000 inhabitants in 2011).<sup>9</sup> Blastomycosis is also found in temperate climates and has been reported mainly from North America, with sporadic cases reported from China, India, the Middle East, Africa and Central and South America.<sup>10–12</sup>

These fungi are endemic in popular tourist destinations.<sup>13</sup> International tourist arrivals have increased in the past few decades from 278 million globally in 1980 to 1.2 billion in 2016 and are expected to reach 1.8 billion by 2030.<sup>13</sup> In 2016, after France (82.6 million international tourist arrivals), the USA and Spain were the second most popular international tourism destinations, with 75.6 million international tourist arrivals each. Asia and the Pacific (Oceania) had the strongest growth of all tourist destinations in 2016 compared to 2015 (9% and 308.4 million tourist arrivals), while Central and South America had

increases of 5 and 7%, with 10.7 and 32.8 million international tourist arrivals, respectively.<sup>14</sup>

The number of non-migrant international travellers who acquire systemic endemic mycoses remains unclear. Current evidence is based predominantly upon case series and outbreak investigations. Comprehensive data assessing the frequency of systemic endemic mycoses among international travellers are lacking. The aim of this analysis was to describe epidemiologic characteristics among non-migrant international travellers who acquired systemic endemic mycoses during travel and were reported to GeoSentinel.

## Methods

### Data source

GeoSentinel is a global clinician-based sentinel surveillance system of travel-related illness among international travellers and migrants, established in 1995 as a collaboration between the Centres for Disease Control and Prevention (CDC) and the International Society of Travel Medicine.<sup>15</sup> It currently consists of 70 specialized travel and tropical medicine clinical sites in 31 countries, mostly affiliated with academic medical centres ([www.istm.org/geosentinel](http://www.istm.org/geosentinel)). All sites have experienced diagnosing and treating patients with travel-related infectious diseases and used the best reference diagnostic methods available in their country. Clinicians determine the final diagnosis coding in GeoSentinel from a list of standard diagnostic codes. GeoSentinel has five systemic endemic fungal infection diagnosis codes: histoplasmosis, coccidioidomycosis, blastomycosis, paracoccidioidomycosis and talaromycosis.

Clinicians may also use the diagnosis code 'other' to input other systemic endemic fungal diagnoses. Upon review of the 'other' diagnosis code, the only other systemic endemic fungal infection identified in the database was talaromycosis. GeoSentinel's data collection protocol has been reviewed by CDC's National Center for Emerging and Zoonotic Infectious Diseases and is classified as public health surveillance and not human subject research. For sites located in countries where national regulations required it, additional ethics clearance was obtained.

### Inclusion and exclusion criteria

GeoSentinel records were included if they met the following case definition: 'a confirmed case of histoplasmosis, coccidioidomycosis, blastomycosis, paracoccidioidomycosis or talaromycosis in a

non-migrant international traveller for which there was a recorded region of exposure, and without the possibility of exposure to the diagnosed mycosis where the traveller resides'. Travellers from an endemic area who had a definitive exposure while abroad in an outbreak setting were included. Regions of exposure were determined using modified United Nations Children's Fund country groupings described elsewhere.<sup>16</sup> A 'confirmed' case of histoplasmosis, coccidioidomycosis, blastomycosis, paracoccidioidomycosis or talaromycosis was defined as 'a compatible clinical history in addition to a positive finding from at least one of the following tests: microscopy, culture, histopathology, nucleic acid or other antigen test or seroconversion or rising serology titre'.

Cryptococcosis was not included; *Cryptococcus neoformans* is not commonly considered an endemic mycosis, and GeoSentinel does not provide species data to include *Cryptococcus gattii*. Furthermore, *C. neoformans* is widely distributed making it difficult to ascertain the country of exposure.

### Data extraction

Data were extracted on traveller demographic characteristics (sex, age, country of residence), trip details (e.g. duration, travel reason, previous travel), clinical information (date of presentation, time to presentation, inpatient or outpatient status, whether there was a pre-travel consultation with a health care provider, syndrome at presentation, other diagnoses and comorbid conditions) and area of acquisition (region or country of exposure). Duration of travel was reported among those who visited one destination country only. Information on specific symptoms was not available, and clinical treatment and outcomes are not routinely reported.

### Statistical analysis

Data were managed using Microsoft Access (Redmond, Washington, USA). All analyses were descriptive and frequencies were performed using SAS version 9.4 (Cary, NC, USA).

## Results

### Records meeting the case definition

From 1997 through 2017, 69 records met the case definition. The most frequently reported endemic mycosis was histoplasmosis (51; 74%), followed by coccidioidomycosis (14; 20%), blastomycosis (3; 4%) (Table 1) and talaromycosis (1; 2%). There were no patient records in the database with a diagnosis of paracoccidioidomycosis.

### Histoplasmosis

Travellers with histoplasmosis ( $n = 51$ ) had a median age of 30 (range: 8–85) (Table 1). More than 80% of travellers with histoplasmosis travelled for tourism (25; 49%) or education (17; 33%). Histoplasmosis was most frequently acquired in Central America or Mexico (34; 69%) [including Nicaragua (14), Guatemala (6), Costa Rica (5), Mexico (3), Belize (3) and Honduras (2); one traveller acquired histoplasmosis in Central America, but the specific country of exposure could not be ascertained]. Histoplasmosis was also acquired in South America (9; 19%) [Ecuador (three travellers), Brazil (two

travellers), Peru (two travellers), Bolivia (one traveller) and Guyana (one traveller)]. The median duration of travel was 12 days (range: 5–154); the median number of days between returning from travel and presenting to a GeoSentinel site was 16 days (range: 1–137). Forty-seven per cent of travellers with histoplasmosis were hospitalized. Only three travellers (6%) were reported to have HIV/acquired immune deficiency syndrome (AIDS).

### Coccidioidomycosis

Travellers with coccidioidomycosis ( $n = 14$ ) were older than those with other systemic endemic mycoses [median age: 62 years (range 22–78 years)] (Table 1). The most frequent reasons for travel were tourism (10; 72%) and business (3; 21%). Almost all travellers with coccidioidomycosis (13 of 14; 93%) were infected in the USA; one traveller acquired the infection in Mexico. The median number of days between return from travel and presentation to a GeoSentinel site was the longest of the endemic mycoses in this analysis (55 days; range: 17–273). Four (29%) travellers were hospitalized. One traveller was reported to have an immune-compromising condition (insulin-dependent diabetes mellitus). Another traveller was reported to have been taking an immunosuppressing or immunomodulating agent within 3 months prior to the clinic visit.

### Other systemic endemic mycoses

Three travellers with blastomycosis were reported. Two travellers with blastomycosis were tourists, and one had visited friends and relatives. They acquired their infections in Mexico, China and Thailand.

One traveller with a prior solid organ transplant was reported to have acquired talaromycosis. This individual travelled to China for planned medical care.

## Discussion

This analysis describes systemic endemic mycoses among international travellers presenting to GeoSentinel sites. The most frequently reported endemic mycosis was histoplasmosis. Although histoplasmosis is found worldwide, rates are much higher in the western hemisphere, but the global burden of histoplasmosis among international travellers remains unclear.<sup>17</sup> A Spanish study reported that 69 (20%) of 342 travellers had a positive histoplasmin skin test 1 month after travelling to Latin America; 13 (19%) were ultimately diagnosed with histoplasmosis.<sup>18</sup> However, reports of histoplasmosis in non-migrant international travellers are limited despite the relatively high incidence in some endemic regions and increasing global volume of travel.<sup>18–23</sup>

In our analysis, almost all travellers with histoplasmosis were exposed in the Americas. Most previously reported travel-associated histoplasmosis infections were acquired in Central and South America and associated with visits to bat-infested caves,<sup>18,20</sup> construction renovations or demolition activities.<sup>21</sup> Only two travel-associated outbreaks have been reported recently from outside the Americas—one in Uganda and the other in Malaysia.<sup>22,23</sup> Travellers with histoplasmosis in our analysis had the lowest median age, and one-third were students

**Table 1.** Characteristics of returned travellers with systemic endemic mycoses reported to GeoSentinel, January 1997 to December 2017<sup>a</sup>

| Characteristic                                                                       | Histoplasmosis<br>( <i>n</i> = 51) | Coccidioidomycosis<br>( <i>n</i> = 14) | Blastomycosis<br>( <i>n</i> = 3) |
|--------------------------------------------------------------------------------------|------------------------------------|----------------------------------------|----------------------------------|
| Median age, years (range)                                                            | 30 (8–85) <sup>b</sup>             | 62 (22–78)                             | 48 (31–56)                       |
| Sex, <i>n</i> (%)                                                                    |                                    |                                        |                                  |
| • Female                                                                             | 20 (39%)                           | 4 (29%)                                | 1 (33%)                          |
| Pretravel consultation, <i>n</i> (%)                                                 |                                    |                                        |                                  |
| • Yes                                                                                | 9 (18%)                            | 2 (14%)                                | 2 (67%)                          |
| • No                                                                                 | 14 (27%)                           | 6 (43%)                                | 1 (33%)                          |
| • Unknown                                                                            | 28 (55%)                           | 6 (43%)                                | 0                                |
| Reasons for travel, <i>n</i> (%)                                                     |                                    |                                        |                                  |
| • Business                                                                           | 2 (4%)                             | 3 (21%)                                | 0                                |
| • Education/student                                                                  | 17 (33%)                           | 0                                      | 0                                |
| • Military                                                                           | 0                                  | 1 (7%)                                 | 0                                |
| • Missionary/volunteer/researcher/aid work                                           | 3 (6%)                             | 0                                      | 0                                |
| • Tourism                                                                            | 25 (49%)                           | 10 (72%)                               | 2 (67%)                          |
| • Visiting friends and relatives                                                     | 4 (8%)                             | 0                                      | 1 (33%)                          |
| Region of exposure                                                                   |                                    |                                        |                                  |
| • Caribbean                                                                          | 2 (4%)                             | 0                                      | 0                                |
| • Central America                                                                    | 34 (66%)                           | 1 (7%)                                 | 1 (33%)                          |
| • North America                                                                      | 0                                  | 13 (93%)                               | 0                                |
| • North East Asia                                                                    | 0                                  | 0                                      | 1 (33%)                          |
| • South America                                                                      | 11 (22%)                           | 0                                      | 0                                |
| • Southeast Asia                                                                     | 1 (2%)                             | 0                                      | 1 (33%)                          |
| • Sub-Saharan Africa                                                                 | 3 (6%)                             | 0                                      | 0                                |
| Median duration of travel, days (range) <sup>c,d</sup>                               | 12 (5–154)                         | 43 (23–821)                            | 8                                |
| Median days between return and presenting to a GeoSentinel site (range) <sup>e</sup> | 16 (1–137)                         | 55 (17–273)                            | 5                                |
| Hospitalized                                                                         | 24 (47%)                           | 4 (29%)                                | 0                                |
| Co-morbid conditions                                                                 |                                    |                                        |                                  |
| • None known to exist                                                                | 46 (90%)                           | 12 (86%)                               | 3 (100%)                         |
| • HIV/AIDS                                                                           | 3 (6%)                             | 0                                      | 0                                |
| • Others                                                                             | 2 (4%) <sup>f</sup>                | 2 (14%) <sup>g</sup>                   | 0                                |

<sup>a</sup>Data on the one traveller with talaromycosis is not presented in the table.

<sup>b</sup>Data for two travellers missing.

<sup>c</sup>Among those who travelled to one destination country only (*n* = 44).

<sup>d</sup>Data for 14 travellers missing [histoplasmosis (*n* = 6), coccidioidomycosis (*n* = 5), blastomycosis (*n* = 2)].

<sup>e</sup>Data for 15 travellers missing [histoplasmosis (*n* = 7), coccidioidomycosis (*n* = 5), blastomycosis (*n* = 2)].

<sup>f</sup>Immunosuppressing/immunomodulating agents [currently or within 3 months of clinic visit (*n* = 1)], «other» immunocompromising condition (*n* = 1).

<sup>g</sup>Immunosuppressing/immunomodulating agents [currently or within 3 months of clinic visit (*n* = 1)], insulin-dependent diabetes mellitus (*n* = 1).

travelling for education. These findings are in part influenced by an outbreak of histoplasmosis among 14 otherwise healthy community college students who travelled to Nicaragua from the USA in 2001 and entered a cave with bats.<sup>24</sup> The infection rate among travellers in this outbreak was 100%. Twelve travellers developed symptoms, including fever, cough, night sweats, myalgia, chills, loss of appetite and headache, and all travellers had an abnormal chest X-ray; almost half were hospitalized, but none died.<sup>24</sup> The mortality of hospitalized histoplasmosis patients is 2–9% depending on age and immune status;<sup>25,26</sup> typically, elderly or immune-compromised patients are at higher risk of developing severe disease.<sup>26,27</sup> The largest known outbreak of histoplasmosis among travellers was reported among college students from the USA after returning from Acapulco, Mexico, in 2001.<sup>28</sup> These findings highlight the importance of histoplasmosis as a potentially severe travel-related disease, even among travellers who are not immune-compromised who may be exposed to a high infectious dose.<sup>24</sup>

Travellers with coccidioidomycosis were older and had the longest median duration from the time of return from travel to

presentation at a GeoSentinel site. The long time may reflect the indolent or subacute nature of coccidioidomycosis but also may be due to GeoSentinel sites' function as referral or specialty centres after preliminary evaluation by another physician or facility. Coccidioidomycosis outbreaks are often associated with occupational exposures (e.g. construction, field work, etc.), but may also be from environmental disruptions such as earthquakes or dust storms.<sup>29</sup> Although we identified only one traveller exposed in Mexico, many reports among travellers to Mexico engaging in missionary construction work have been reported.<sup>30,31</sup>

In this analysis, one traveller with blastomycosis acquired the infection in Mexico, while two others acquired the infection in Asia (Thailand and China). Few autochthonous cases from Asia have been published, possibly indicating a very low disease burden in this region.<sup>10,11</sup> No human blastomycosis infections have been published from Thailand. However, recently, cutaneous blastomycosis was detected in a Persian cat from Thailand (confirmed by histopathology and PCR from tissue samples).<sup>32</sup> We report here the first published travel-related blastomycosis

infection acquired in Thailand. Nevertheless, the risk of blastomycosis for travellers visiting Asia is likely low. Although we only report one traveller with talaromycosis, this disease represents a serious public health issue in Southeast Asia and should be considered in immune-compromised travellers returning from Southeast Asia.<sup>5</sup>

No traveller with paracoccidioidomycosis met our inclusion criteria. This may be because: (i) paracoccidioidomycosis usually occurs in rural areas that may be off the usual tourist routes, (ii) clinicians may not be testing for it, (iii) laboratories may not be able to test (if the best reference diagnostic methods are not available in their country, as is the case for the *Histoplasma* antigen test outside the USA) or (iv) the majority of travellers may remain asymptomatic and not seek medical care. Also, recent travel history may not indicate a risk of paracoccidioidomycosis (or other systemic endemic mycoses), because the exposure may have been months or even years prior.<sup>4</sup>

This analysis of GeoSentinel surveillance data has several limitations. GeoSentinel surveillance data are not population-based, so risks and rates cannot be determined. GeoSentinel does not routinely collect data on all traveller co-morbidities; therefore, this analysis likely underreports the number of travellers with each systemic endemic mycosis that may have an underlying immune-compromising condition. For example, over 90% of travellers with histoplasmosis in our study were presumed to be healthy individuals without any evidence of being immune-compromised; only three travellers were noted to have HIV/AIDS. Additionally, of those travellers with HIV/AIDS, T cell counts and viral loads were not available to assess the degree of immune-compromise. Similarly, death is not well recorded through GeoSentinel surveillance; data are collected from a single time point and may not capture a later death. Given the specialized nature of GeoSentinel sites as tropical or travel medicine referral centres, the data are not generalizable to all international travellers, and the median number of days between returning from travel and visiting a GeoSentinel site varies considerably. Furthermore, we are unable to quantify the number of travellers who may have had an exposure but remained asymptomatic or did not seek care at a GeoSentinel site. Furthermore, information on specific symptoms was not available, and clinical treatment and outcomes are not routinely reported. Despite the use of standard diagnosis codes, data coding and entry practices might vary by clinician and site (e.g. cases of systemic endemic mycoses may not have been entered into the database if a specific diagnostic code was not available). Furthermore, diagnostic testing information was not routinely collected; therefore, we are limited by our reliance on the reporting providers' clinical judgement and their interpretation of diagnostic test results.

In conclusion, systemic endemic mycoses should be considered in the differential diagnosis of non-migrant international travellers. Clinician knowledge of the geographic distributions and the modes of transmission of systemic endemic mycoses may improve personalized pre-travel consultation and help prevent infections in travellers who may be at increased risk of exposure or greater risk of infection if exposed. Clinicians should also be aware of the Infectious Disease Society of America's recommendations on systemic endemic mycoses,

which can assist with both diagnostic and treatment recommendations.<sup>33–36</sup>

## Funding

GeoSentinel, the Global Surveillance Network of the International Society of Travel Medicine (ISTM), is supported by a cooperative agreement (U50CK00189) from the CDC as well as ISTM and the Public Health Agency of Canada.

## Acknowledgements

We would like to thank Ms. Kayce Maisel at ISTM for her kind assistance with coordinating the development and finalization of this manuscript. Additional members of the GeoSentinel Surveillance Network who contributed data but did not author this article are: Jesse Waggoner and Henry Wu (Atlanta, Georgia, USA), Katherine Plewes and Wayne Ghesquiere (Vancouver, Canada), Andrea Boggild and Kevin Kain (Toronto, Canada), Abraham Goorhuis (Amsterdam, Netherlands), Daniel Leung and Scott Benson (Salt Lake City, Utah, USA), Susan Kuhn (Calgary, Canada), Effrosyni Gkrania-Klotsas and Ben Warne (Cambridge, UK), David Laloo and Nicholas Beeching (Liverpool, UK), Cedric Yansouni (Montreal, Canada), Frank von Sonnenburg and Camilla Rothe (Munich, Germany), Poh Lian Lim (Singapore), Patricia Schlagenhauf and Rainer Weber (Zurich, Switzerland), Francesco Castelli and Alberto Matteelli (Brescia, Italy), Karin Leder and Joseph Torresi (Melbourne, Australia), Johannes Clerinx (Antwerp, Belgium), Christina Coyle (Bronx, New York, US), Paul Kelly (Bronx, New York, US), Christof Vinnemeier (Hamburg, Germany), Emilie Javelle (Marseille, France), Anne McCarthy (Ottawa, Canada) and Hedvig Glans (Stockholm, Sweden).

**Conflict of interest:** None declared.

## Authors' contributions

Study design: H.J.F.S., R.J.S., K.M.A., T.R., S.J., C.L., D.H.H. Data collection: H.J.F.S., T.R., M.P.G., M.L., R.L.V., A.D., H.A., C.C.A., E.S., P.G., E.B., S.J., D.H.H. Analysis: H.J.F.S., R.J.S., K.M.A., D.H.H. Interpretation: H.J.F.S., R.J.S., K.M.A., T.R., M.P.G., M.L., R.L.V., A.D., H.A., C.C.A., E.S., P.G., E.B., S.J., C.L., D.H.H.

## References

1. Queiroz-Telles F, Fahal AH, Falci DR *et al.* Neglected endemic mycoses. *Lancet Infect Dis* 2017; 17:e367–77.
2. Ashbee HR, Evans EG, Viviani MA *et al.* Histoplasmosis in Europe: report on an epidemiological survey from the European Confederation of Medical Mycology Working Group. *Med Mycol* 2008; 46:57–65.
3. Benedict K, Mody RK. Epidemiology of histoplasmosis outbreaks, United States, 1938–2013. *Emerg Infect Dis* 2016; 22:370–8.
4. Shikanai-Yasuda MA, Mendes RP, Colombo AL *et al.* Brazilian guidelines for the clinical management of paracoccidioidomycosis. *Rev Soc Bras Med Trop* 2017; 50:715–40.
5. Le T, Kinh NV, Cuc NTK *et al.* A trial of itraconazole or amphotericin B for HIV-associated talaromycosis. *N Engl J Med* 2017; 376:2329–40.
6. Diaz JH. Travel-related risk factors for coccidioidomycosis. *J Travel Med* 2018; 25(1), doi:10.1093/jtm/ta027.
7. Tsang CA, Tabnak F, Vugia DJ *et al.* Increase in reported coccidioidomycosis United States, 1998–2011. *Morb Mortal Wkly Rep* 2013; 62:217–21.



8. Cooksey GS, Nguyen A, Knutson K *et al.* Notes from the field: increase in coccidioidomycosis – California, 2016. *Morb Mortal Wkly Rep* 2017; **66**:833–4.
9. Giacomazzi J, Baethgen L, Carneiro LC *et al.* The burden of serious human fungal infections in Brazil. *Mycoses* 2016; **59**:145–50.
10. Rao GR, Narayan BL, Durga Prasad BK *et al.* Disseminated blastomycosis in a child with a brief review of the Indian literature. *Indian J Dermatol Venereol Leprol* 2013; **79**:92–6.
11. Zhao TM, Gao J, She DY, Chen LA. Blastomycosis in China: a case report and literature review. *Chin Med J (Engl)* 2011; **124**:4368–71.
12. Castillo CG, Kauffman CA, Miceli MH. Blastomycosis. *Infect Dis Clin North Am* 2016; **30**:247–64.
13. Panackal AA, Hajjeh RA, Cetron MS, Warnock DW. Fungal infections among returning travelers. *Clin Infect Dis* 2002; **35**:1088–95.
14. The United Nations World Tourism Organization. UNWTO tourism highlights. 2017; 2017 Edition(1–16). <http://mkt.unwto.org/publication/unwto-tourism-highlights> (18 May 2018, accessed).
15. Harvey K, Esposito DH, Han P *et al.* Surveillance for travel-related disease—geosentinel surveillance system, united states, 1997–2011. *MMWR Surveill Summ* 2013; **62**:1–23.
16. Leder K, Torresi J, Brownstein JS *et al.* Travel-associated illness trends and clusters, 2000–2010. *Emerg Infect Dis* 2013; **19**:1049–73.
17. Antinori S. *Histoplasma capsulatum*: more widespread than previously thought. *Am J Trop Med Hyg* 2014; **90**:982–3.
18. Gascon J, Torres JM, Jimenez M *et al.* Histoplasmosis infection in Spanish travelers to Latin America. *Eur J Clin Microbiol Infect Dis* 2005; **24**:839–41.
19. Segel MJ, Rozenman J, Lindsley MD *et al.* Histoplasmosis in Israeli travelers. *Am J Trop Med Hyg* 2015; **92**:1168–72.
20. Julg B, Elias J, Zahn A *et al.* Bat-associated histoplasmosis can be transmitted at entrances of bat caves and not only inside the caves. *J Travel Med* 2008; **15**:133–6.
21. Warren KA, Weltman A, Hanks C *et al.* Outbreak of histoplasmosis among travelers returning from El Salvador—Pennsylvania and Virginia, 2008. *Morb Mortal Wkly Rep* 2008; **57**:1349–53.
22. Cottle LE, Gkrania-Klotsas E, Williams HJ *et al.* A multinational outbreak of histoplasmosis following a biology field trip in the Ugandan rainforest. *J Travel Med* 2013; **20**:83–7.
23. Ohno H, Ogata Y, Suguro H *et al.* An outbreak of histoplasmosis among healthy young Japanese women after traveling to Southeast Asia. *Intern Med* 2010; **49**:491–5.
24. Weinberg M, Weeks J, Lance-Parker S *et al.* Severe histoplasmosis in travelers to nicaragua. *Emerg Infect Dis* 2003; **9**:1322–5.
25. Chu JH, Feudtner C, Heydon K *et al.* Hospitalizations for endemic mycoses: a population-based national study. *Clin Infect Dis* 2006; **42**:822–5.
26. Assi MA, Sandid MS, Baddour LM *et al.* Systemic histoplasmosis: a 15-year retrospective institutional review of 111 patients. *Medicine (Baltimore)* 2007; **86**:162–9.
27. McKinsey DS, Spiegel RA, Hutwagner L *et al.* Prospective study of histoplasmosis in patients infected with human immunodeficiency virus: Incidence, risk factors, and pathophysiology. *Clin Infect Dis* 1997; **24**:1195–203.
28. Morgan J, Cano MV, Feikin DR *et al.* A large outbreak of histoplasmosis among American travelers associated with a hotel in Acapulco, Mexico, spring 2001. *Am J Trop Med Hyg* 2003; **69**:663–9.
29. Freedman M, Jackson BR, McCotter O, Benedict K. Coccidioidomycosis outbreaks, united states and worldwide, 1940–2015. *Emerg Infect Dis* 2018; **24**:417–23.
30. Cairns L, Blythe D, Kao A *et al.* Outbreak of coccidioidomycosis in Washington state residents returning from Mexico. *Clin Infect Dis* 2000; **30**:61–4.
31. Zurlo J, Crook T, Green W *et al.* Coccidioidomycosis in travelers returning from Mexico—Pennsylvania, 2000. *Morb Mortal Wkly Rep* 2000; **49**:1004–6.
32. Duangkaew L, Larsuprom L, Kasondorkbua C *et al.* Cutaneous blastomycosis and dermatophytic pseudomycetoma in a Persian cat from Bangkok, Thailand. *Med Mycol Case Rep* 2017; **15**:12–5.
33. Wheat LJ, Freifeld AG, Kleiman MB *et al.* Clinical practice guidelines for the management of patients with histoplasmosis: 2007 update by the Infectious Diseases Society of America. *Clin Infect Dis* 2007; **45**:807–25.
34. Chapman SW, Dismukes WE, Proia LA *et al.* Clinical practice guidelines for the management of blastomycosis: 2008 update by the Infectious Diseases Society of America. *Clin Infect Dis* 2008; **46**:1801–12.
35. Galgiani JN, Ampel NM, Blair JE *et al.* 2016 Infectious Diseases Society of America (IDSA) clinical practice guideline for the treatment of coccidioidomycosis. *Clin Infect Dis* 2016; **63**:717–22.
36. Saag MS, Graybill RJ, Larsen RA *et al.* Practice guidelines for the management of cryptococcal disease. Infectious Diseases Society of America. *Clin Infect Dis* 2000; **30**:710–8.
